# Supplementary material for: A new functionalized magnetic nanocomposite of poly(methylacrylate) for the efficient removal of anionic dyes from aqueous media
Source: Royal Society of Chemistry journal article supplement (doi:10.1039/c5ra20151a), 2016-01-01
Supplement: c5ra20151a1.pdf [file c5ra20151a1.pdf]

## Supplementary

### **A new functionalized magnetic nanocomposite of poly (methylacrylate) for the efficient removal of anionic dyes from aqueous media**

Ali Pourjavadi<sup>\*, a</sup>, Azardokht Abedin-Moghanaki<sup>a</sup>, Seyed Amirhossein Nasser<sup>a</sup>

<sup>a</sup>Polymer Research Laboratory, Department Of Chemistry, Sharif University of Technology, Azadi Avenue, P.O.Box 11365-9516, Tehran, Iran

---

\* Corresponding author  
E- mail address: [purjavad@sharif.edu](mailto:purjavad@sharif.edu)

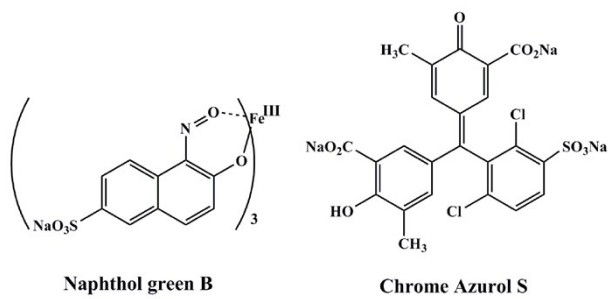

**Fig. S1** Structure of dyes

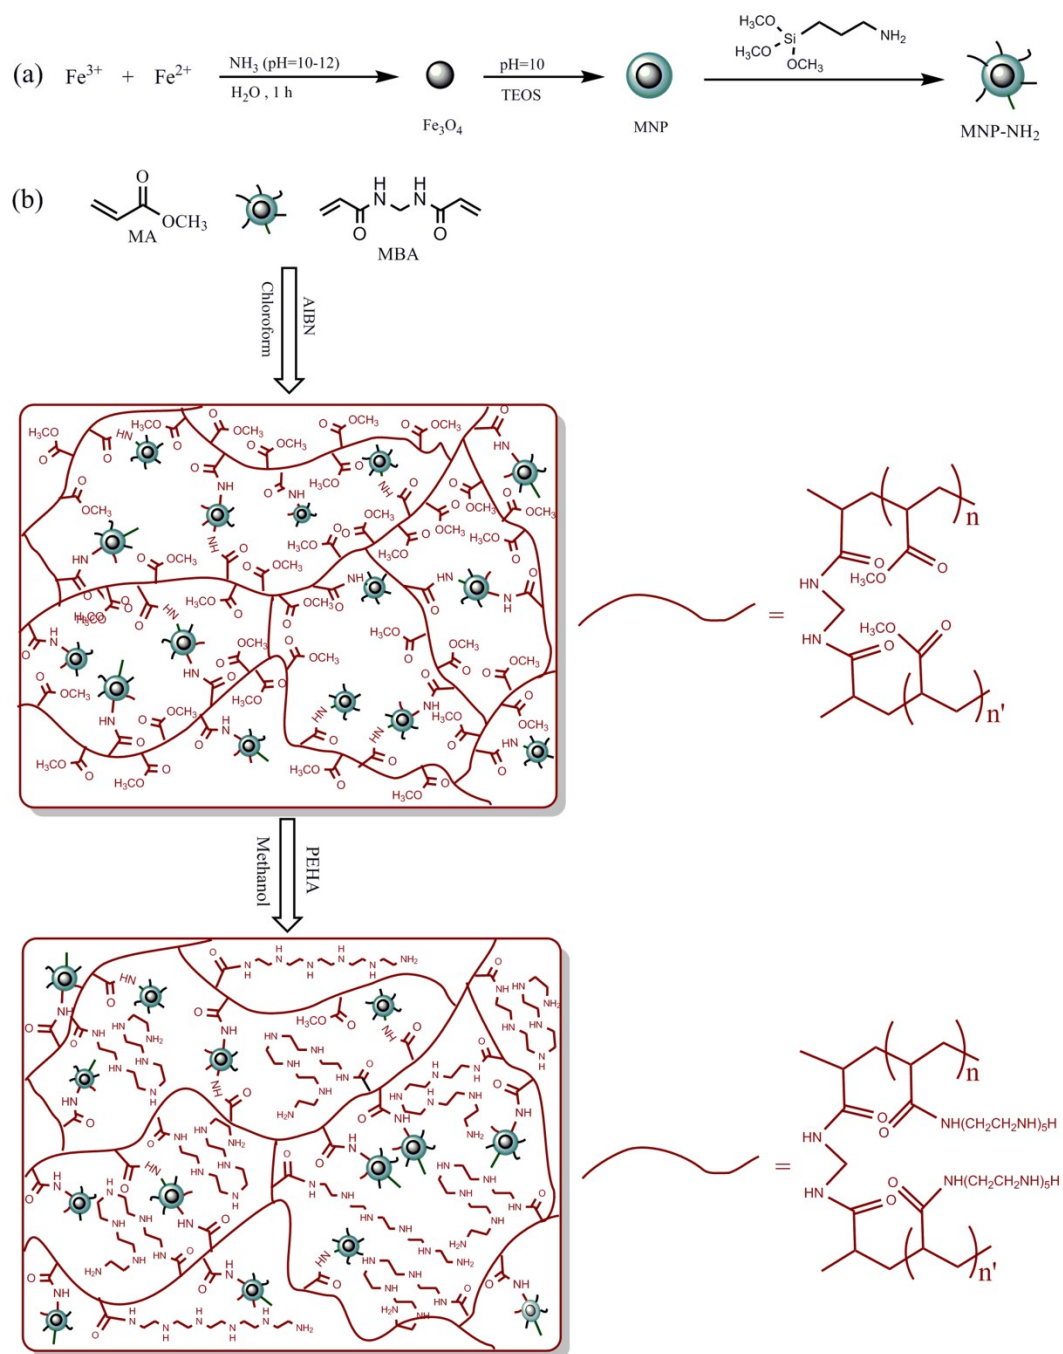

Fig. S2 Preparation of MPM-PEHA nanocomposite

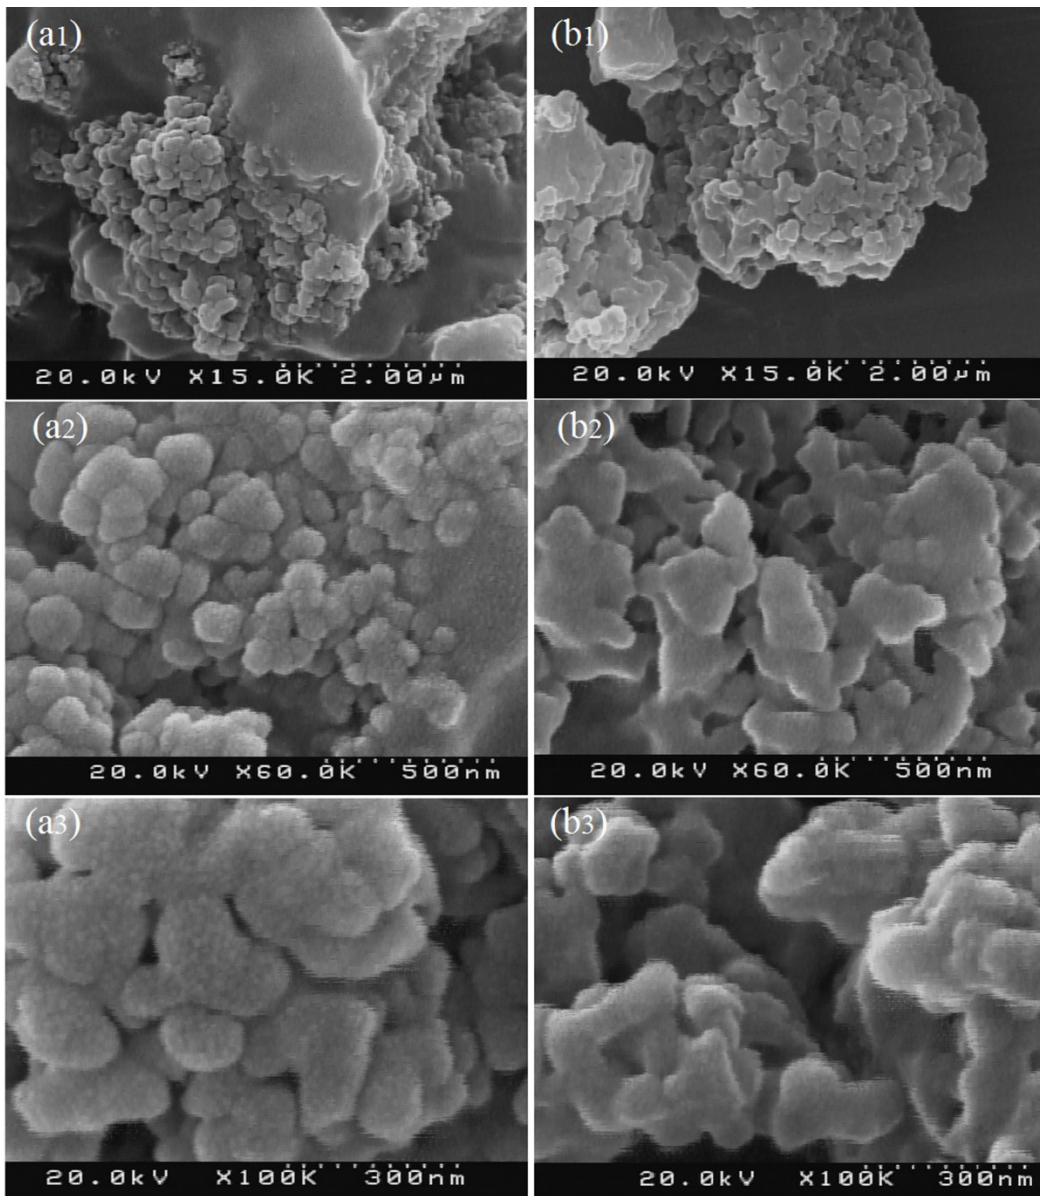

**Fig. S3** SEM images of MPM (a1, a2 and a3) and MPM-PEHA nanocomposite (b1, b2 and b3) at different magnification

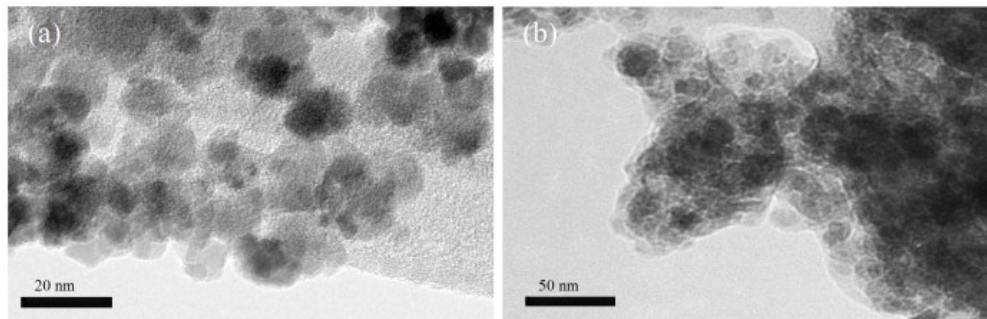

**Fig. S4** TEM images of Fe<sub>3</sub>O<sub>4</sub> (a) and MPM-PEHA nanocomposite (b)
